# Supplementary material for: Use of 3D printing and modular microfluidics to integrate cell culture, injections and electrochemical analysis
Source: Royal Society of Chemistry journal article supplement (doi:10.1039/c8ay00829a), 2018-01-01
Supplement: c8ay00829a4.pdf [file c8ay00829a4.pdf]

**Supplemental Information for:**  
**Use of 3D Printing and Modular Microfluidics to Integrate Cell Culture, Injections and Electrochemical Analysis**

By: Akash S. Munshi, Chengpeng Chen, Alexandra D. Townsend and R. Scott Martin\*

Department of Chemistry, Saint Louis University

\*corresponding author:

Dr. R. Scott Martin  
3501 Laclede Ave  
St. Louis, MO, USA 63103  
+1 314-977-2836  
scott.martin@slu.edu

**STL files included as supplemental information**

- 1) Cell Culture Module (depicted in Figure 1B)
- 2) Wall-Jet Module (depicted in Figure 1C)
- 3) Sample Injection Module-Rotor (depicted in Figure 3A)
- 4) Sample Injection Module-Base (depicted in Figure 3B)

**SI- Section 1: Endothelial cell culture**

Bovine pulmonary endothelial cells (bPAECs; ATCC Manassas, VA, USA) were purchased frozen at a concentration of  $1 \times 10^6$  cells/mL. Upon arrival the cells were thawed and seeded to a 60 cm<sup>2</sup> tissue culture petri dish using a DMEM media (ATCC Manassas, VA, USA) supplemented with 5 mL penicillin/ streptomycin (1 % v/v) and 62.5 mL bovine serum albumin (10% v/v). Except for when passaging, harvesting or changing media, the cells were kept in an incubator at 37 °C and 5% CO<sub>2</sub>. When the cells reached ~ 80% confluency, they were harvested from the flask using a trypsin reagent pack (CC-5034; Lonza, Walkersville, MD, USA). These cells were diluted to a concentration of  $\sim 1 \times 10^6$  cells/mL in complete media and used for the cell studies.

SI- Section 2: Supplemental Figures

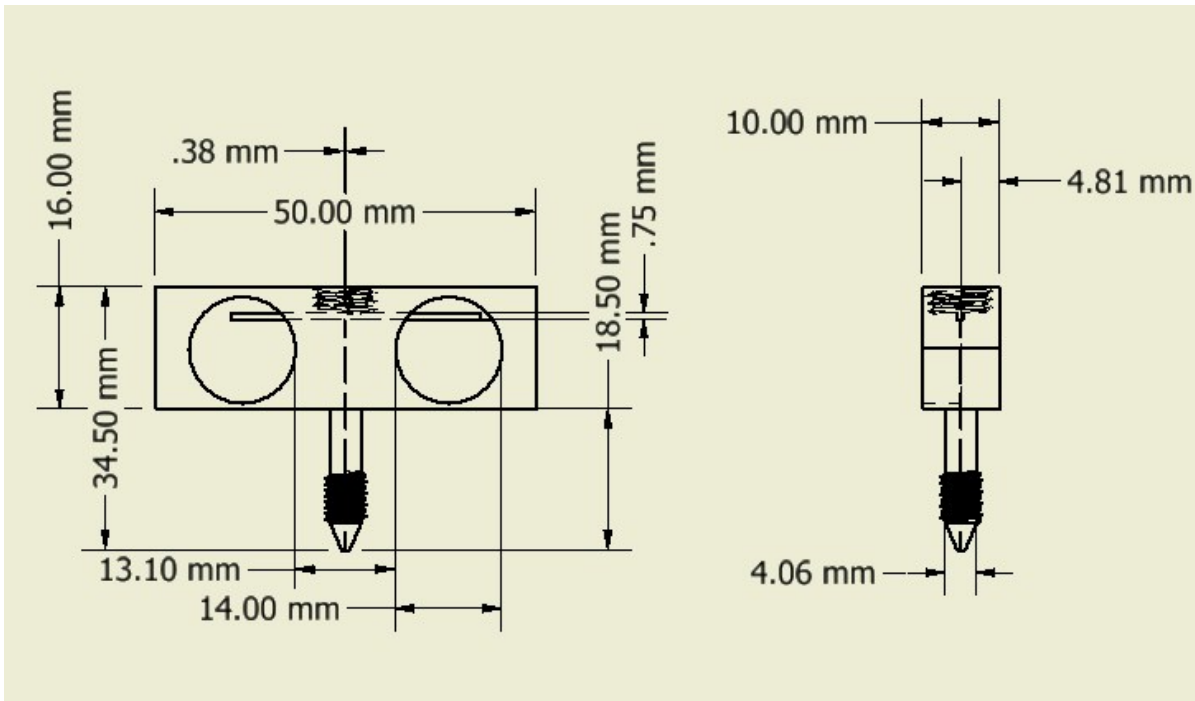

Figure S1: CAD drawing of Wall-Jet (WJE) device.

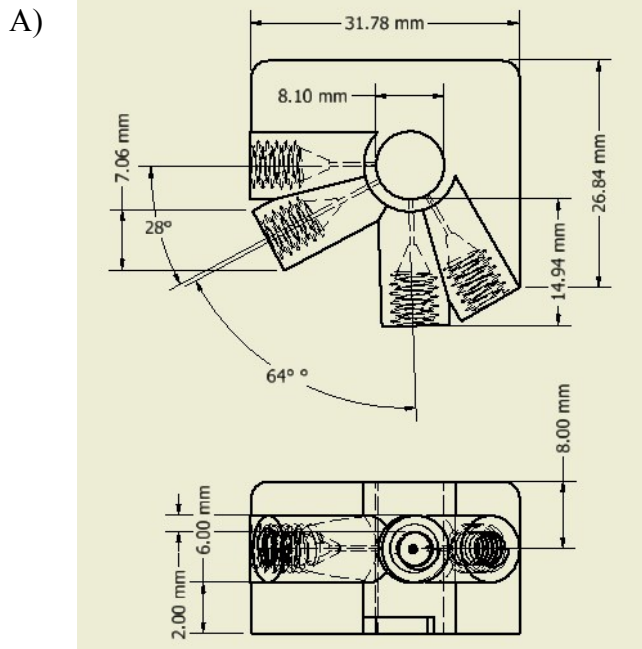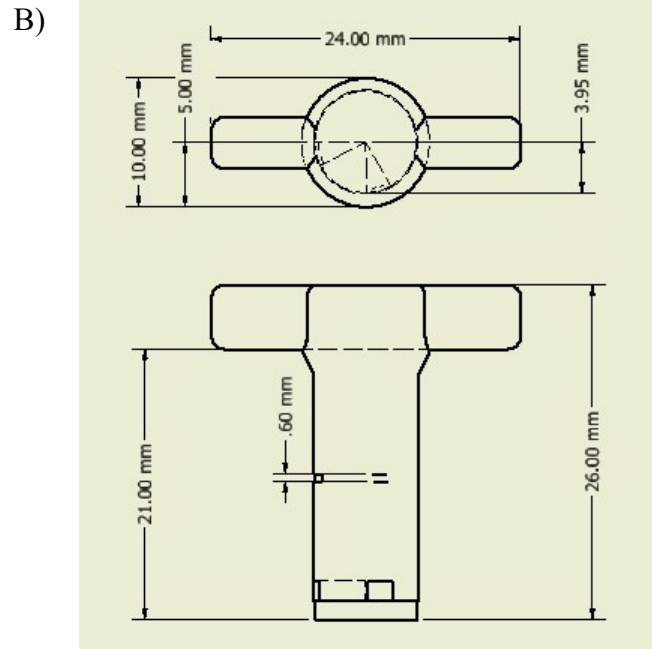

**Figure S2:** CAD drawing of 3-D printed sample injection module. (A) Sample injection module- base component. (B) Sample injection module- rotor component.

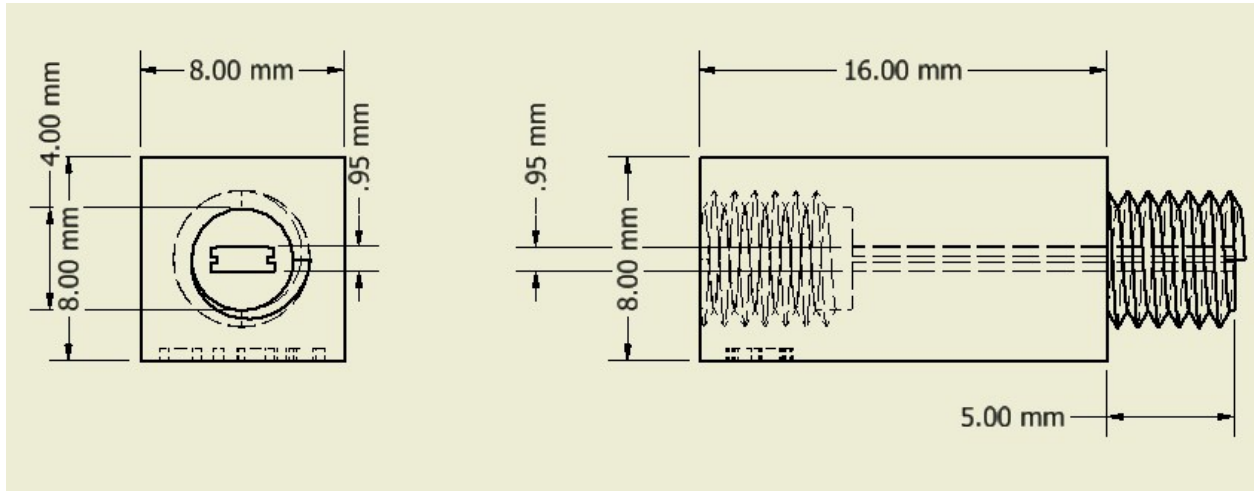

**Figure S3:** CAD drawing of the 3-D printed cell culture module.

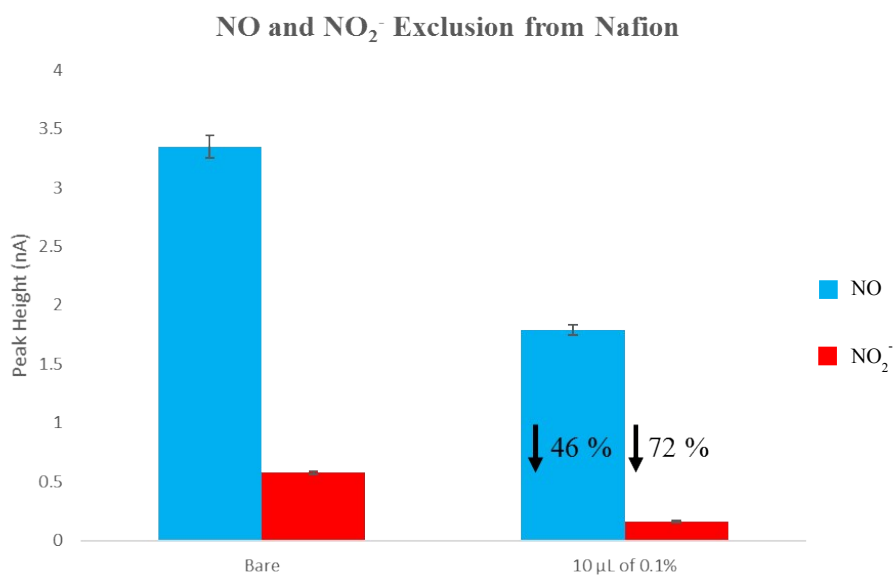

**Figure S4:** Electrode Modification with Nafion. With the addition of 0.1 % Nafion, we see a reduction in peak height of 46 % for NO and 72 % for NO<sub>2</sub><sup>-</sup>, giving an NO:NO<sub>2</sub><sup>-</sup> peak height ratio of 11.1. The NO:NO<sub>2</sub><sup>-</sup> peak height ratio for the bare electrode is 5.8, showing increased electrode selectivity for NO with the Nafion coating ( $n = 5$ , error bars are standard deviation).
